# Supplementary material for: Stability of African Swine Fever Virus in Soil and Options to Mitigate the Potential Transmission Risk
Source: MDPI journal article supplement (doi:10.3390/pathogens9110977), 2020-11-23
Supplement: s1 [file s1]

## Supplements:

Table S1: Parameters of purchased potting soil

| Parameter                                    | Commercial Potting Soil |
|----------------------------------------------|-------------------------|
| <b>pH</b>                                    | 5.8                     |
| <b>Organic Material</b>                      | 65%                     |
| <b>Salt Content</b>                          | 2.0 mg/L                |
| <b>Nitrogen</b>                              | 250 mg/L                |
| <b>Phosphorus P<sub>2</sub>O<sub>5</sub></b> | 250 mg/L                |
| <b>Potassium Oxide K<sub>2</sub>O</b>        | 450 mg/L                |
| <b>Magnesium</b>                             | 170 mg/L                |
| <b>Sulfur</b>                                | 130 mg/L                |

Table S2: Soil analysis results

| Parameter<br>(%Total<br>Mass) | Yard<br>Soil | Swamp       | Forest Soil<br>1 | Forest Soil<br>2 | Beach<br>Sand |
|-------------------------------|--------------|-------------|------------------|------------------|---------------|
| <b>pH</b>                     | <b>6.7</b>   | <b>5.1</b>  | <b>4.1</b>       | <b>3.2</b>       | <b>6.6</b>    |
| Potassium                     | 0.046        | 0.025       | 0.053            | 0.034            | 0.017         |
| Magnesium                     | 0.086        | 0.092       | 0.053            | 0.04             | 0.057         |
| <b>Organic material</b>       | <b>2.4</b>   | <b>71.8</b> | <b>14.4</b>      | <b>30.9</b>      | <b>0.1</b>    |
| Phosphorus                    | 0.094        | 0.088       | 0.037            | 0.050            | 0.016         |
| Nitrogen                      | 0.12         | 2.25        | 0.034            | 0.80             | N/A           |
| Sulfur                        | 0.02         | 0.77        | 0.04             | 0.09             | 0.0044        |
